# Supplementary material for: High density lipoprotein (HDL) particles from end-stage renal disease patients are defective in promoting reverse cholesterol transport
Source: PubMed Central journal article supplement (PMC5288657; doi:10.1038/srep41481), 2017-02-02
Supplement: srep41481-s1.pdf [file srep41481-s1.pdf]

## **Supplementary Information:**

### **High density lipoprotein (HDL) particles from end-stage renal disease patients are defective in promoting reverse cholesterol transport**

Josephine L.C. Anderson<sup>1</sup>, Thomas Gautier<sup>2</sup>, Niels Nijstad<sup>1</sup>, Markus Toelle<sup>3</sup>, Mirjam Schuchardt<sup>3</sup>, Markus van der Giet<sup>3</sup>, and Uwe J.F. Tietge<sup>1</sup>

<sup>1</sup> Department of Pediatrics, University Medical Center Groningen, University of Groningen, Groningen, The Netherlands

<sup>2</sup> INSERM UMR866 Lipides, Nutrition, Cancer; Faculté de Médecine, Dijon, France

<sup>3</sup> Medizinische Klinik IV – Nephrology, Charite – Campus Benjamin Franklin, Berlin, Germany

Supplemental Table S1: Clinical and biochemical characteristics of the end-stage renal disease (ESRD) patients and controls investigated

|                               | ESRD (n=15)   | Controls (n=15) | <i>P</i> value |
|-------------------------------|---------------|-----------------|----------------|
| Age (years)                   | 48 (31-56)    | 46 (26-64)      | n.s.           |
| Sex (male/female)             | 10/5          | 9/6             | n.s.           |
| Body weight (kg)              | 74 (56-83)    | 69 (59-90)      | n.s.           |
| Duration of dialysis (months) | 38 (24-78)    | 0               |                |
| Serum creatinine (mg/dl)      | 7.1 (5.4-9.4) | 1.0 (0.7-1.2)   | <0.001         |
| Blood urea nitrogen (mg/dl)   | 26 (22-38)    | 14 (10-16)      | <0.001         |
| Total protein (g/l)           | 64 (50-81)    | 69 (67-73)      | n.s.           |
| Cholesterol (mg/dl)           | 251 (184-283) | 180 (166-214)   | <0.05          |
| CRP (mg/l)                    | 5.8 (2.0-8.5) | 1.1 (0.7-1.5)   | <0.001         |
| Smoking                       | 3 (20)        | 0 (0)           | <0.01          |
| Diabetes                      | 6 (40)        | 0 (0)           | <0.001         |
| Coronary heart disease        | 6 (40)        | 0 (0)           | <0.001         |
| Lipid lowering drugs          | 9 (60)        | 0 (0)           | <0.001         |

Data are presented as median (range) or total numbers (%).

Supplemental Table S2: Mass composition of HDL isolated from ESRD patients and controls

|                       | controls<br>(n=15) | ESRD<br>(n=13)          |
|-----------------------|--------------------|-------------------------|
| Cholesterol ester (%) | 14.1 ± 0.3         | 11.3 ± 0.9 <sup>§</sup> |
| Free cholesterol (%)  | 4.5 ± 0.1          | 4.8 ± 0.1 <sup>§</sup>  |
| Phospholipids (%)     | 14.5 ± 0.6         | 13.7 ± 0.7              |
| Triglycerides (%)     | 2.8 ± 0.1          | 5.2 ± 0.5 <sup>§</sup>  |
| Protein (%)           | 64.2 ± 0.7         | 65.0 ± 1.1              |

Values are means ± SEM.

Significantly different from controls: <sup>§</sup> at least p<0.05.

## Supplemental figure S1

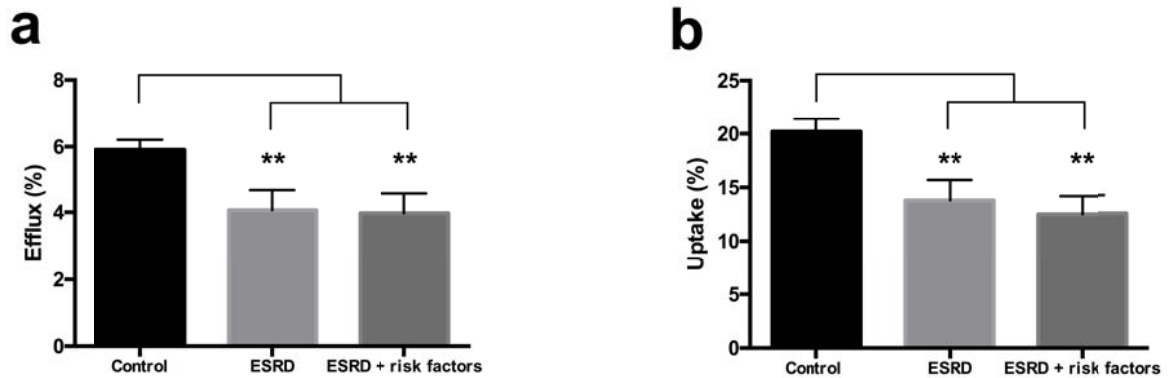

Supplemental figure S1: ESRD-HDL displays defective cholesterol uptake as well as cholesterol delivery properties. (a) Cholesterol efflux from primary mouse peritoneal macrophages towards HDL and (b) Cellular SR-BI mediated selective cholesterol uptake from HDL. In these experiments HDL was used isolated either from healthy controls subjects (control, n=15), ESRD-patients without additional risk factors (ESRD, n=5) and ESRD patients with at least one of the additional risk factors smoking, diabetes and lipid lowering medication (ESRD + risk factors, n=10). Data are presented as means  $\pm$  SEM. \* $p < 0.05$ , \*\*\* $p < 0.001$
